# Supplementary material
Source: publisher figshare collection journal article supplement (https://gsapubs.figshare.com/ndownloader/files/36557886)
Supplement: Supplementary file 1 [file 36557886]

## Sheet: Table S1
Table S1 Major element analyses of the clinopyroxene in the Wajilitag nepheline syenite, Tarim LIP, NW China.
Sample	WZ-04-01-Q4-1-PY-M	WZ-04-01-Q4-2-PY-M	WZ-04-01-Q4-3-PY-M	WZ-04-01-Q4-4-PY-M	WZ-04-01-Q4-5-PY-M	WZ-04-01-Q4-6-PY-C	WZ-04-01-Q4-7-PY-C	WZ-04-01-Q4-8-PY-C	WZ-04-01-Q4-9-PY-C	WZ-04-01-Q4-10-PY-C	WZ1903-13-1-Q3-1	WZ1903-11-2-Q2-2	WZ1903-4-2-Q1-4	WZ-9-1-Q9-3	WZ-04-01-Q5-1-PY	WZ-04-01-Q5-2-PY	WZ-04-01-Q5-3-PY	WZ-04-01-Q5-4-PY	WZ-04-01-Q5-5-PY	WZ-04-01-Q5-6-PY	WZ-04-01-Q5-7-PY	WZ-04-01-Q5-10-PY	WZ-11-2-Q4-21	WZ-13-01-Q5-2	WZ1903-8-Q1-3	WZ1903-13-1-Q2-4	WZ1903-13-1-Q2-1	WZ1903-11-2-Q2-1	WZ1903-8-Q2-3	WZ1903-8-Q3-4	WZ1903-13-1-Q3-2	WZ1903-9-1-Q1-4	WZ1903-9-1-Q1-1	WZ1903-8-Q2-6	WZ1903-8-Q4-3	WZ1903-4-2-Q1-3	WZ1903-9-1-Q3-4	WZ1903-9-1-Q4-3
	Edge aegirine-augite					Core diopside									Aegirine-augite
SiO2	50.88	51.65	49.87	50.45	51.28	47.1	48.28	48.48	48.29	49.47	45.69	47.93	48.33	48.45	52.06	51.87	49.16	50.53	50.74	49.02	49.23	51.19	51.09	52.65	46.96	51.58	51.16	50.37	51.04	52.94	51.83	50.98	51.46	51.86	51.35	51.02	51.32	51.46
TiO2	0.5	0.58	0.58	0.61	0.59	3.06	3.17	2.73	3.18	2.46	3.84	2.86	2.83	3.28	0.45	0.48	0.64	1.15	0.98	0.93	1.41	0.94	0.18	0.33	2.65	0.38	0.41	0.48	0.52	0.4	0.36	0.93	0.46	0.44	0.46	0.66	0.63	0.47
Al2O3	1.34	1.38	1.34	1.34	1.45	4.94	4.78	4.07	5.13	3.53	7.06	5.64	5.37	5.01	1.21	1.39	1.58	3.55	3.02	2.98	4.04	2.68	1.29	1.11	5.62	1.94	2.57	2.45	1.23	1.16	1.84	3.29	1.57	1.15	2.62	2.84	2.6	1.7
FeO	21.67	21.69	21.51	21.59	21.75	6.39	6.59	6.14	6.51	6.26	6.63	6.16	6.85	8.12	23.49	21.87	21.66	13.76	13.69	13.67	13.05	12.96	17.44	22.49	11.01	19.53	17.66	16.51	23.89	23.06	19.98	11.96	22.81	21.54	16.65	12.12	14.47	21.63
MnO	0.98	1.07	1.11	1.13	1.17	0.12	0	0.14	0.16	0.1	0.07	0.1	0.13	0.14	1.07	1.02	1.12	0.63	0.77	0.58	0.65	0.68	0.97	0.96	0.36	0.97	1.16	0.97	1.04	0.8	1.03	0.38	1.15	1.02	0.96	0.58	0.79	1.15
MgO	4.15	4.14	4.05	4.09	4.23	13.04	13.3	13.58	13.11	14.32	12.5	13.55	12.81	13.24	2.69	3.97	4.06	8.63	8.69	8.47	8.8	9.3	6.85	3.33	9.94	4.53	5.59	6.72	2.11	2.87	4.48	9.96	2.58	3.74	5.98	9.84	8.23	3.7
CaO	15.33	15.95	16.59	16.1	16.36	23.49	23.35	23.01	23.3	23.43	22.85	22.63	22.63	23.27	9.77	12.65	16.01	20.58	20.72	20.66	20.92	21.26	13.74	10.46	21.3	13.51	15.05	18.48	9.69	5.42	12.64	20.62	10.8	9.42	14.96	21.06	19.86	13.2
Na2O	5.05	4.76	4.67	4.69	4.45	0.53	0.52	0.56	0.48	0.56	1.22	1.15	1.44	0.45	8.28	6.86	4.46	2.05	1.99	2.13	1.79	1.84	6.22	8.35	1.45	6.2	5.44	3.72	7.83	10.29	6.63	2.56	7.8	7.86	4.81	2.52	3.12	6.38
Si	2.02	2.02	1.99	2	2.01	1.79	1.8	1.83	1.8	1.84	1.72	1.79	1.8	1.79	2.08	2.04	1.98	1.92	1.93	1.92	1.89	1.94	2.03	2.08	1.8	2.04	2.01	1.96	2.08	2.14	2.05	1.92	2.07	2.09	2.02	1.93	1.95	2.04
Al(ⅳ)	0	0	0.01	0	0	0.21	0.2	0.17	0.2	0.07	0.28	0.21	0.2	0.21	0	0	0.02	0.08	0.07	0.08	0.11	0.06	0	0	0.2	0	0	0.04	0	0	0	0.08	0	0	0	0.07	0.05	0
Al(ⅵ)	0.06	0.06	0.05	0.06	0.07	0.01	0.01	0.01	0.02	0	0.03	0.03	0.04	0	0.06	0.06	0.06	0.08	0.07	0.05	0.07	0.06	0.06	0.05	0.06	0.09	0.12	0.08	0.06	0.06	0.09	0.07	0.07	0.05	0.12	0.06	0.07	0.08
Ti	0.01	0.02	0.02	0.02	0.02	0.09	0.09	0.08	0.09	0.07	0.11	0.08	0.08	0.09	0.01	0.01	0.02	0.03	0.03	0.03	0.04	0.03	0.01	0.01	0.08	0.01	0.01	0.01	0.02	0.01	0.01	0.03	0.01	0.01	0.01	0.02	0.02	0.01
Fe3+	0.38	0.33	0.41	0.37	0.33	0.1	0.07	0.07	0.05	0.1	0.18	0.15	0.16	0.09	0.56	0.49	0.39	0.13	0.13	0.2	0.14	0.12	0.51	0.59	0.15	0.41	0.38	0.32	0.52	0.64	0.44	0.2	0.53	0.5	0.26	0.23	0.25	0.45
Fe2+	0.32	0.36	0.29	0.32	0.37	0.1	0.13	0.13	0.15	0.1	0.02	0.04	0.05	0.16	0.18	0.2	0.32	0.3	0.3	0.24	0.27	0.28	0.05	0.12	0.2	0.22	0.19	0.2	0.26	0.1	0.2	0.17	0.2	0.2	0.28	0.14	0.2	0.24
Mn	0.03	0.04	0.04	0.04	0.04	0	0	0	0	0	0	0	0	0	0.04	0.03	0.04	0.02	0.02	0.02	0.02	0.02	0.03	0.03	0.01	0.03	0.04	0.03	0.04	0.03	0.03	0.01	0.04	0.03	0.03	0.02	0.03	0.04
Mg	0.25	0.24	0.24	0.24	0.25	0.74	0.74	0.76	0.73	0.79	0.7	0.75	0.71	0.73	0.16	0.23	0.24	0.49	0.49	0.49	0.5	0.53	0.41	0.2	0.57	0.27	0.33	0.39	0.13	0.17	0.26	0.56	0.15	0.22	0.35	0.56	0.47	0.22
Ca	0.65	0.67	0.71	0.68	0.69	0.95	0.93	0.93	0.93	0.93	0.92	0.9	0.9	0.92	0.42	0.53	0.69	0.84	0.85	0.87	0.86	0.86	0.58	0.44	0.88	0.57	0.63	0.77	0.42	0.23	0.54	0.83	0.46	0.41	0.63	0.85	0.81	0.56
Na	0.39	0.36	0.36	0.36	0.34	0.04	0.04	0.04	0.03	0.04	0.09	0.08	0.1	0.03	0.64	0.52	0.35	0.15	0.15	0.16	0.13	0.14	0.48	0.64	0.11	0.48	0.41	0.28	0.62	0.81	0.51	0.19	0.61	0.62	0.37	0.18	0.23	0.49
Wo	32.35	33.48	34.72	33.89	34.27	49.31	48.65	48.14	48.95	47.54	48	46.78	46.72	47.59	20.87	26.48	34.08	43.39	43.55	43.72	44.53	44.23	28.42	21.94	45.79	29.03	32.08	38.6	21.31	11.87	27.07	42.45	23.27	20.58	32.9	42.94	40.84	28.05
En	12.18	12.1	11.8	11.97	12.33	38.09	38.55	39.52	38.33	40.42	36.54	38.96	36.8	37.68	8	11.55	12.03	25.32	25.4	24.94	26.05	26.91	19.74	9.72	29.73	13.54	16.56	19.54	6.45	8.73	13.35	28.51	7.73	11.36	18.29	27.91	23.53	10.95
Fs	36.2	36.34	35.8	36.28	36.54	10.58	10.84	10.21	10.89	9.99	10.81	9.98	11.1	13.08	39.13	35.97	36.7	23.45	23.48	23.19	22.52	21.94	28.56	36.62	18.85	33.3	30.4	27.8	41.05	38.67	33.91	19.51	38.6	36.98	29.65	19.86	24.02	36.46
Ac	19.27	18.08	17.68	17.86	16.86	2.03	1.96	2.13	1.83	2.05	4.65	4.29	5.38	1.65	32	26	17.18	7.83	7.57	8.15	6.9	6.92	23.28	31.72	5.63	24.13	1.65	32	26	17.18	7.83	7.57	8.15	6.9	6.92	23.28	31.72	5.63
Number of ions (apfu) calculated on the basis of 6O atoms

## Sheet: Table S2
Table S2 Trace element analyses of the clinopyroxene in the Wajilitag nepheline syenite and nephelinite, Tarim LIP, NW China.
Sample	WZ11-2-Q4-1	WZ13-1-Q5-1	WZ11-2-Q4-3	WZ11-2-Q3-2	WZ11-2-Q4-2	WZ11-2-Q3-1	WZ4-2-Q3-1	WZ4-2-Q3-2	WZ11-2-Q3-3	WZ9-1-Q3-3	WZ9-1-Q4-1	WZ8-Q4-1	WZ9-1-Q3-1	WZ13-1-Q4-2	WZ13-1-Q5-2	WZ4-2-Q3-6	WZ4-2-Q3-3	WZ11-2-Q4-4	WZ8-Q3-1	WZ13-1-Q5-4	WZ11-2-Q4-5	WZ13-1-Q5-3	WZ9-1-Q4-2	WZ13-1-Q1-2	WZ4-2-Q5-1	WZ8-Q1-1	WZ2-1-Q1-2	WZ4-2-Q3-7	WZ8-Q1-4	WZ9-1-Q3-5	WZ2-1-Q2-2	WZ9-1-Q3-2	WZ8-Q2-1	WZ4-2-Q4-1	WZ2-1-Q1-1	WZ2-1-Q1-3	WZ8-Q3-2	WZ8-Q4-2	WZ8-Q2-2	WZ8-Q1-3	BT-5-Q2	BT-5-Q3	BT-5-Q4	BT-5-Q5	BT-9-Q1	BT-9-Q2	BT-9-Q3	BT-9-Q4	BT-9-Q5
	Nepheline syenite																																								Nephelinite
	Core diopside								Aegirine-augite																																Diopside
SiO2	47.47	47.99	47.12	49.28	47.05	49.38	48.71	47.67	49.37	48.91	48.12	47.43	49.59	48.5	48.38	49.06	49.7	49.73	46.91	48.33	48.96	50.32	50.2	48.82	48.29	50.03	50.85	50.17	51.13	48.52	49.6	49.05	51.22	49.17	50.62	51.87	50.94	50.42	51.71	52.14	45.06	45.85	47.9	47.11	47.55	46.9	47.78	47.18	44.44
TiO2	2.45	2.27	2.61	1.88	2.74	1.53	2.24	2.44	1.48	0.64	1.03	1.25	0.55	0.71	2.26	0.86	0.75	0.63	1.46	0.58	0.45	0.25	0.48	0.39	2.1	1.68	0.99	0.7	0.53	1.95	0.61	0.47	0.5	0.86	2.98	0.5	0.6	0.48	0.5	0.54	3.4	3.15	2.37	2.82	2.88	2.97	2.73	2.84	4.21
Al2O3	4.56	5.18	5.08	3.22	5.28	3.25	4.75	5.18	2.96	2	3.38	3.79	2.03	2.9	3.98	3.14	2.46	1.78	4	3.2	1.96	1.36	1.61	1.84	2.24	2.06	3	1.54	1.9	1.38	1.51	1.41	1.48	1.82	1.29	1.27	1.38	1.14	1.6	1.28	7.07	5.94	4.46	4.43	6.3	6.09	4.12	5.35	7.7
FeO	6.25	5.96	6.51	7.05	6.4	7.84	7.41	7.88	9.71	12.39	11.98	11.74	13.98	13.09	10.66	12.27	12.75	14.28	14.64	19.22	16.97	17.47	19.37	19.01	18.55	20.15	19.78	21.38	21.5	21.53	19.89	22.35	22.89	21.9	20.03	22.49	23.99	23.88	23.82	24.98	7.62	8.14	7.1	6.68	7.58	7.63	7.51	7.5	8.08
MnO	0.09	0.09	0.1	0.16	0.1	0.18	0.16	0.17	0.38	0.66	0.49	0.51	0.72	0.87	0.34	0.57	0.61	0.76	0.81	1.16	1.09	1.05	1.05	1.33	0.99	1.07	0.99	0.92	1.05	1.04	0.92	1.1	1.03	0.9	0.87	0.91	0.85	1.06	0.85	0.54	0.2	0.25	0.23	0.21	0.2	0.21	0.25	0.21	0.21
MgO	13.75	13.65	13.63	13.59	13.37	12.91	12.61	12.39	11.39	10.73	10.15	9.99	9.88	9.7	9.69	9.59	9.56	9.02	7.74	6.92	6.8	6.54	5.5	5.42	5.03	4.49	4.11	4.1	3.54	3.51	3.45	3.23	3.18	2.72	2.67	2.63	2.62	2.39	2.31	1.63	11.83	11.7	13.06	13.44	11.98	12.15	12.86	12.7	11.27
CaO	24.68	23.42	24.13	23.92	24.25	23.75	22.8	22.98	22.74	21.37	22.47	22.93	18.55	19.19	21.3	21.6	21.7	20.08	18.9	13	19.18	17.39	15.01	17.99	14.62	10.6	11.07	12.67	10.96	13.77	13.57	12.71	9.34	11.18	12.06	10.58	7.64	9.72	6.94	5.48	23.04	23.11	23.22	24.11	21.87	22.49	23.23	22.79	22.33
Na2O	0.43	1.11	0.47	0.55	0.46	0.74	0.82	0.82	1.45	2.39	1.7	1.63	3.24	3.02	2.1	2.17	1.79	2.94	3.34	4.79	3.62	4.74	5.44	4.14	5.5	7.34	6.9	7.14	7.9	6.6	7.21	7.25	8.49	8.78	7.44	8	9.99	8.98	10.39	11.55	1.2	1.17	1.08	0.67	1.17	1.05	0.86	0.91	1.11
K2O		0.01	0.01				0.02		0.02	0.17			0.63	0.87	0.49	0.06	0	0.01	0.74	1.73	0.06	0.02	0.28	0.04	0.79	1.06	1.03	0.19	0.16	0.03	0.03	0.16	0.29	0.05	0.07	0.01	0.16	0.01	0.04	0.1	0.07	0	0	0	0	0	0.05	0	0.01
P2O5	0.03	0.04	0.03	0.03	0.03	0.03	0.03	0.03	0.03	0.02	0.02	0.02	0.02	0.08	0.03	0.02	0.02	0.02	0.48	0.02	0.06	0.02	0.02	0.02	0.62	0.04	0.07	0.02	0.02	0.02	1.73	0.43	0.09	0.87	0.37	0.28	0.1	0.02	0.06	0.02	0.01	0.03	0.02	0.02	0	0.01	0.04	0.02	0.03
Li	10.6	10.47	12.34	13.42	12.95	12.53	20.31	19.68	24.67	37.79	16.37	16.2	69.16	145.47	22.28	17.63	13.19	28.46	80.7	169.93	15.93	21.46	57.52	20.21	78.28	118.48	65.06	34.7	28.45	30.48	22.7	32.29	46.54	22.71	21.13	23.12	25.6	20.15	18.02	27.6	5.09	7.65	3.96	3.23	5.38	6.22	3.95	9.39	22.17
Be	0.38	0.24	0.32	1.23	0.93	1.8	1.12	2.23	3.49	7.56	3.38	4.29	14.74	14.54	5.37	5.3	3.46	4.7	8.87	17.13	6.43	16.52	24.69	7.78	12.42	17.13	15.11	18.89	18.6	19.67	16.46	24.87	24.7	15.47	18.01	14.42	25.45	32.58	21.26	16.44	1.76	1.63	1.9	0.92	1.51	1.82	1.88	1.39	2.48
B	1.32	1.3	1.82	1.49	0.86	0.63	2.39	0.99	1.99	5.6	1.93	1.21	5.25	19.43	3.98	4.39	2.11	3.16	3.46	20.54	6.55	22.72	7.8	4.23	8.52	13.18	19.02	6.86	9.44	7.05	9.17	6.68	6.12	10.57	21.98	4.63	8.04	4.35	11.39	10.99	2.33	1.69	1.73	0.24	1.62	0.98	2.01	1.75	1.02
Sc	74.67	88.18	57.11	58.82	56.95	62.58	64.38	58.32	44.34	36.28	19.33	25.29	38.36	40.93	58.27	28.33	31.35	23.08	11.71	11.81	11.81	19.13	8.91	8.69	11.29	10.44	8.86	17.62	8.88	15.41	10.25	9.87	8.13	9.64	9.01	9.33	9.43	9.27	10.77	16.84	44.63	25.92	31.26	51.19	50.18	37.8	41.98	44.99	44.07
V	184.5	177.79	190.91	212.67	184.53	198.43	228.68	194.59	216.82	168.8	165.26	157.33	166.05	146.9	266.03	157.9	153.51	223.85	164.82	181.78	205.37	256.08	228.2	195.67	232.42	244.91	237.1	254.84	262.96	275.02	224.53	251.55	251.01	245.73	241.72	239.44	277.7	249.27	280.41	341.61	186.08	193.14	143.15	150.99	185.98	176.11	150.95	149.26	190.89
Cr	36.87	12.3	42.7	9.26	46.45	30.27	177.38	82.93	11.68	383.94	2.44	17.58	199.89	283.49	34.35	90.43	94.12	34.99	2.71	5.14	8.36	12.21	17.32	3.61	15.88	24.02	5.99	40.53	36.23	30.5	34.77	28.03	12.21	18.09	15.41	11.04	29.32	32.25	21.79	31.55	16.87	2.13	3.33	1.18	106.59	2.21	19.15	1.27	2.42
Co	32	29.95	30.61	31.2	29.75	34.5	34.68	32.74	30.38	23.71	35.08	34.35	28.24	25.76	31.64	36.27	35.79	33.22	30.29	28.19	32.51	20.74	25.34	25.92	28.91	25.89	24.98	23.16	23.16	22.48	18.95	21.85	22.58	17.54	16.41	18.15	17.04	19.26	13.41	7.15	23.7	25.57	25.64	23.35	25.01	24.51	25.67	23.85	23.06
Ni	69.61	63.21	53.01	36.87	51.81	47.19	104.07	99.87	31.31	29.54	15.43	48.91	32.59	113.39	36.39	96.08	97.95	28.98	14.29	11.32	15.92	7.13	49.92	7.43	15.84	14.93	9.75	19.19	10.56	11.7	9	9.43	8.53	5.98	6.52	6.33	6.66	6.79	4.56	2.66	20.27	18.45	37.47	18.02	54.58	19.16	48.02	20.04	17.61
Cu	0.37	1.09	0.1	0.34	0.18	0.14	1.28	0.12	0.45	3.34	0.52	0.43	4.84	3.4	1.85	0.27	0.13	1.11	0.66	3.01	0.83	0.63	2.17	5.24	1.56	1.76	0.99	1.3	3.78	7.68	1.72	6.03	1.19	1.48	0.96	1.73	3.17	1.66	1.66	2.8	2.71	0.34	1.37	0.09	0.23	0.15	6.94	0.17	1.73
Zn	28.77	46.02	30.8	50	29.11	57.03	72.23	56.57	141.98	368.6	186.31	192.9	502.67	444.35	171.56	220.73	230.39	292.42	328.09	712.9	371.38	358.24	567.16	615.82	582.26	586.37	551.94	479.92	494.56	535.09	516.4	604.56	624.24	405.84	512.22	502.05	475.59	601.98	371.08	218.53	66.63	86.07	73.55	64.01	69.94	71.6	86.91	71.89	79.28
Ga	13.01	12.31	14.41	10.23	14.59	13.05	15.03	16.93	14.65	15.29	21.22	22.99	19.99	23.25	21.39	20.24	18.47	19.85	29.47	28.67	20.28	14.81	20.01	20.54	32.65	34.85	32.24	22.08	25.45	29.65	39.04	29.77	27.62	35.69	36.05	27.53	29.12	30.85	31.05	22.71	19.83	20.96	15.1	14.51	18.51	17.3	16.05	16.41	24.33
Ge	1.61	1.79	2.66	2.22	2.55	2.14	2.31	2.33	2.54	2.8	2.56	3.19	2.98	3.12	2.79	3.09	2.84	3.7	4.6	2.87	3.46	3.14	2.42	3.81	6.16	6.63	4.29	3.63	3.96	5.52	6.95	4.62	4.09	5.63	8.06	4.97	4.32	3.07	4.98	4.74
Rb	0	1.64	0.34	0	0.01	0.01	0.22	0	6.96	20.65	0.83	0	106.11	91.23	13.53	12.03	0	1.19	101.24	168.84	4.27	1.64	48.51	8.7	158.62	129.02	197.04	36.15	47.45	6.4	6.82	12.77	50	10.64	3	0.92	24.82	0.66	7.11	12.7	4.63	0	0.09	0.04	0	0.05	2.83	0.01	0.19
Sr	163.35	148.8	188.04	201.49	209.8	313.39	331.1	334.98	355.11	659.74	1069.54	1159.11	681.74	1120.39	521.95	475.06	538.38	592.99	1027.8	373.7	582.34	382.55	502.7	376.83	470.49	596.25	315.48	245.37	403.75	412.78	1395.57	751.67	250.4	750.11	573.55	445.47	206.49	229.72	330.47	617.58	633.92	1028.67	1159.56	691.11	596.92	670.56	1142.02	685.91	757.79
Y	13.84	13.23	16.35	20.69	18.84	26.23	34.13	35.77	22.32	22.88	21.73	29.36	24.27	77.25	36.45	23.82	25.37	27.28	55.44	24.36	22.38	32.34	20.58	23.2	78.21	74.16	46.81	23.2	28.53	67.58	70.26	39.22	25.15	64.98	95.02	18.99	32.06	19.41	34.57	31.65	48.42	74.04	62.01	57.84	48.89	52.06	57.09	52.91	67.94
Zr	120.48	119.88	130.44	110.13	147.66	246.2	392.41	378.03	473.46	754.79	698.76	959.76	918.85	1536.83	1009.96	899.92	886.39	1177.14	1652.64	1514.63	1251.68	1293.34	1769.05	1850.3	2355.14	2929.17	2559.33	2686.96	3361.37	5079.76	2552.1	6518.21	4623.2	5014.61	4027.92	4108.4	6269.34	7573.79	6076.56	5760.21	725.19	1279	800.9	902.5	557.19	757.89	911.86	810.8	1227.21
Nb	0.7	1.96	0.83	0.86	1.11	0.74	3.96	2.9	1.29	10.69	2.59	3.69	7.02	9.92	122.42	2.65	2.08	1.82	79.85	18.06	8.94	2.5	8.11	3.13	242.45	289.68	122.8	51.69	26.43	346.12	55.36	4.36	12.23	80.55	572.8	18.94	21.81	12.57	17.59	6.93	4.64	7.4	5.55	3.99	3.66	4.12	6.69	3.98	9.78
Mo	0.18	0.06	0.13	0.38	0.05	0.03	0.06	0	0.17	2.23	0	0	12.14	5.97	5.42	4.61	0.3	0.38	0.69	4.37	1.16	0.95	2.31	0.6	2.84	46	1.95	6.51	11.4	1.01	0.99	0.81	2.49	8.69	3.93	1.23	4.73	0.85	4.45	4.14	0.1	0	0	0	0	0.02	0.21	0	0.13
Ag	0	0.06	0	0	0.01	0	0.06	0	0	0.01	0.03	0	0.01	0	0.07	0	0.02	0.03	0.09	0	0.02	0.03	0.05	0	0.05	0.04	0.01	0.04	0.14	0.11	0.03	0.04	0.04	0	0.14	0	0.01	0	0.01	0	0.06	0.05	0.1	0.01	0.08	0.09	0.05	0.06	0.05
Cd	0	0	0.34	0	0.4	1.38	1.22	0	0.13	1.08	0.65	1.87	2.27	0	0.11	1.52	0	0.83	0	0.18	0.86	0.24	2.55	1.23	1.73	0.97	1.61	1.01	0.76	1.62	0.58	2.12	1.57	2.34	2.27	1.07	0	0.63	1.36	0.74	0.04	0.17	0	0	0	0	0.18	0.15	0.32
In	0.17	0.17	0.2	0.24	0.22	0.15	0.18	0.21	0.35	0.36	0.45	0.47	0.36	0.78	0.53	0.55	0.53	0.64	0.75	0.79	0.93	0.89	0.56	1.11	0.68	0.58	0.5	0.58	0.58	0.5	0.47	0.45	0.46	0.42	0.42	0.41	0.41	0.31	0.48	0.71
Sn	2.42	2.85	2.82	2.55	3.34	3.31	4.8	6.04	4.28	5.17	7.03	7.53	5.21	7.14	6.09	6.94	6.68	5.86	11.25	7.48	5.84	5.99	9.99	9.22	16.02	14.91	15.8	13.59	15.15	20.09	14.34	20.45	14.97	17.98	19.3	17.12	15.66	13.42	16.93	19.53	4.37	4.18	2.26	2.92	3.78	4.11	3.08	3.81	6.19
Sb	0.1	0.19	0.07	0.02	0	0.09	0	0.05	0.01	0.21	0	0	0.15	0.59	0.36	0.15	0.08	0.07	0.16	0.76	0.25	0.87	0.19	0.16	0.4	0.84	0.52	0.37	0.62	0.21	0.35	0.13	0.24	0.53	2.29	0.07	0.61	0.19	0.83	0.69	0	0.02	0	0.05	0	0	0	0	0
Te	0	0	0	0	0	0	0	0	0	0	0	0	0	0	0	0	0	0	0	0	0	0	0	0	0	0	0	0	0	0	0	0	0	0	0	0	0	0	0	0
Cs	0.02	0.9	0.02	0.01	0.01	0.02	0.05	0	0.65	0.41	0.05	0.03	5.78	0.43	0.05	0.46	0	0	0.68	1.41	0.59	0.01	1.92	0.13	2.16	0.44	0.93	0.93	0.18	0.19	0.17	0.2	0.93	0.26	0.07	0	0.15	0.02	0.17	0.02	0.09	0	0.03	0.01	0	0	0.08	0	0.01
Ba	0.45	0.25	0.17	0.11	0.73	0.17	8.06	1.76	0.79	22.13	0.4	0.36	120.19	79.7	962.26	1.42	0	0.38	43.57	211.46	4.92	1.12	41.76	7.72	35.93	74.75	22.46	7.68	27.11	2.46	11.16	11.04	12.01	5.81	8.27	0.91	11.61	1.72	7.7	25.02	2.3	0.75	0.59	0.38	0.51	0.27	9.02	0.43	4.81
La	6.48	6.1	9.96	8.26	12.93	13.67	26.45	25.1	18.75	41.57	31.19	40.08	53.52	414.94	84.95	35.92	40.21	46.82	154.16	38.62	45.61	54.87	32.55	62.4	336.39	483.87	184.77	48.68	103.16	188.96	801.94	186.69	71.75	611.44	382.9	140.05	72.72	26.16	318.87	116.86	31.54	53.47	49.46	39.12	30.18	34.2	47.02	34.22	50.37
Ce	24.73	21.46	42.08	31.44	52.02	43.98	87.71	85.21	51.24	88.36	84.04	105.02	91.38	474.82	165.53	81.03	94.85	109.89	320.53	63.19	98.77	80.64	68.33	100.77	603.46	660.98	304.05	88.9	147.29	387.14	1015.04	283.19	102.09	867.84	740.75	283.16	135.75	48.87	396.69	175.44	104.99	165.07	152.42	124.12	95.75	110.12	139.16	110.69	155.65
Pr	4.57	3.96	7.34	5.68	9.24	7.21	13.76	13.84	6.97	9.86	10.08	12.95	9.57	37.43	17.11	9.22	10.28	11.45	34.27	5.67	9.82	7.95	6.92	11.08	58.35	54.81	28.1	8.24	12.5	40.37	75.15	23.99	8.42	66.21	74.25	23.97	12.69	4.51	32.67	15.43	16.33	25.17	22.93	19.08	15.03	17.68	20.77	17.46	23.6
Nd	25.19	20.38	37.52	29.5	46.34	35.78	66.27	66.46	33.07	34.84	36.75	49.8	33.67	106.7	59.92	33.26	37.25	37.57	121.4	18.36	31.45	24.47	23.31	31.66	196.48	169.73	86.15	25.96	38.55	130.4	202.98	70.88	24.42	201.66	236.85	72.16	39.25	13.9	96.06	49.05	86.54	124.77	112.55	100.47	78.29	88.71	102.17	90.41	122.47
Sm	6.56	5.32	9.33	8.8	10.82	9.24	15.31	15.26	8.25	5.5	6.57	9.32	5.96	15.93	9.79	5.87	6.21	6.56	19.21	3.14	4.8	4.03	3.82	4.47	29.43	23.37	12.1	4.01	6.11	20.27	24.7	9.19	3.69	24.79	36.15	9.61	6.17	2.38	12.14	7.13	21.13	29.76	24.59	23.97	19.12	21.83	23.96	21.7	28.74
Eu	2.22	1.89	3.08	2.68	3.61	3.11	4.81	5.11	2.46	2.07	2.21	2.81	1.87	4.47	3.37	2.04	1.95	1.88	5.88	0.87	1.78	1.46	1.36	1.25	8.64	6.43	3.73	1.35	1.71	5.72	6.95	2.62	1.14	6.77	10.41	2.37	1.69	0.72	3.2	2.14	6.66	9.31	7.74	7.43	6.41	6.86	7.49	6.92	9.07
Gd	6.44	5.46	7.41	7.67	9.08	8.86	12.53	13.71	7.67	5.86	6.24	7.46	5.63	14.86	9.75	5.59	5.79	6.02	17.3	2.92	4.6	4.49	3.67	4.35	27.45	22.75	11.85	3.85	6.81	17.01	28.18	10.64	4.02	26.16	31.35	7.94	6.14	2.47	11.06	6.68	18.97	26.2	21.53	21.86	17.15	18.99	20.33	19.63	25.62
Tb	0.74	0.65	0.94	1.02	1.04	1.19	1.7	1.8	0.94	0.76	0.74	1.05	0.62	1.78	1.23	0.76	0.88	0.76	2.05	0.48	0.56	0.65	0.52	0.56	3.09	2.41	1.47	0.53	0.81	2.3	2.56	1.03	0.53	2.25	3.71	0.72	0.72	0.43	1.02	0.83	2.32	3.23	2.66	2.79	2.33	2.57	2.59	2.59	3.33
Dy	3.4	3.39	4.54	4.87	5.51	6.13	8.82	8.49	4.83	4.16	4.1	5.42	3.74	10.66	7.09	4.25	4.79	4.58	10.72	2.96	3.73	4.2	3.23	3.51	16.53	13.56	8.4	3.38	4.38	12.5	13.17	6.15	3.51	11.21	19.7	3.54	4.49	2.52	5.75	4.91	12.16	18.09	15.2	14.56	12.01	12.88	14	14.16	17.09
Ho	0.53	0.53	0.69	0.79	0.78	1.05	1.42	1.66	0.85	0.78	0.81	1.1	0.78	2.06	1.23	0.81	0.82	0.91	2.02	0.65	0.74	0.98	0.75	0.76	3.2	2.49	1.65	0.76	1.04	2.45	2.53	1.38	0.87	2.16	3.73	0.72	1.01	0.62	1.14	1.01	1.99	3.09	2.56	2.4	2.03	2.29	2.32	2.22	2.9
Er	1.23	1.28	1.46	1.99	1.8	2.44	3.52	3.57	2.11	2.34	2.31	2.89	2.68	6.43	3.47	2.68	2.78	2.97	5.31	2.98	2.72	4.55	3	3.14	8.85	7.56	5.37	2.82	3.86	7.66	7.31	5.4	3.74	6.25	9.91	2.56	4.16	2.9	3.9	3.83	4.36	6.92	5.62	5.5	4.57	4.49	5.29	4.82	6.21
Tm	0.12	0.13	0.12	0.22	0.18	0.28	0.37	0.38	0.36	0.48	0.32	0.5	0.55	1.11	0.54	0.49	0.48	0.61	0.83	0.81	0.64	1.23	0.8	0.86	1.3	1.31	0.93	0.67	0.98	1.43	1.09	1.25	0.89	1.16	1.38	0.6	0.96	0.88	0.99	0.8	0.52	0.8	0.76	0.67	0.55	0.56	0.74	0.57	0.83
Yb	0.63	0.48	0.68	1.12	0.76	2.1	2.8	2.35	2.54	3.96	3.17	3.77	5.49	8.4	3.38	4.5	4.49	5.46	6	7.98	6.57	11.4	8.23	9.18	10.55	11.69	8.74	7.73	11.89	12.82	9.46	13.2	10.86	10.18	11.04	7.63	10.88	10.39	12.41	9.36	3.1	5.44	4.52	3.99	3.01	3.42	4.71	3.56	4.74
Lu	0.08	0.1	0.09	0.18	0.15	0.24	0.32	0.33	0.61	0.92	0.63	0.86	1.08	1.74	0.79	0.96	1.07	1.34	1.32	2.01	1.69	2.35	1.72	2.59	2.13	2.57	1.98	1.97	2.87	2.47	1.91	2.87	2.54	2.09	2.12	1.81	2.46	2.39	2.98	2.36	0.47	0.77	0.62	0.54	0.41	0.51	0.68	0.48	0.56
Hf	5.66	5.63	5.76	4.56	6.37	8.76	13.5	14.2	11.54	17.09	16.88	24.54	17.18	45.45	22.76	21.65	20.84	26.82	45.62	34.31	27.2	29.54	38.24	45.61	62.59	60.32	55.13	56.75	73.44	97.63	51.24	124.4	97.98	119.87	79.96	81.97	124.29	140.69	119.67	115.99	22.57	35.26	21	27.2	17.4	22.74	26.27	24.69	36.42
Ta	0.11	0.14	0.21	0.09	0.26	0.13	0.76	0.64	0.14	0.15	0.18	0.28	0.06	0.14	3.73	0.11	0.11	0.06	4.7	0.12	0.25	0.03	0.07	0.04	10.77	7.9	3.53	1.57	0.4	11.33	1.48	0.06	0.14	2.58	20.01	0.5	0.26	0.09	0.31	0.06	1.18	1.61	1.17	1.02	0.79	0.92	1.31	0.95	2.44
W	0.15	1.54	0.01	0.01	0	0	0.04	0.16	0	1.03	0.13	0.07	6.15	3.24	8.29	0.25	0	0.12	0.38	0.87	0.21	0.1	0.83	0.3	1.34	15.65	0.64	2.77	2.71	0.47	0.59	0.33	1.61	5.3	2.53	0.62	10.31	0.29	3.93	3.89	0.18	0	0.01	0	0	0.01	0.08	0.02	0.02
Hg	0	0	0	0	0	0	0	0	0	0	0	0	0	0	0	0	0	0	0	0	0	0	0	0	0	0	0	0	0	0	0	0	0	0	0	0	0	0	0	0	0	0	0	0	0	0	0	0	0
Tl	0	0.02	0	0	0	0	0.05	0	0	0.03	0.04	0	0.07	0.09	0.04	0.02	0	0	0.15	0.26	0.05	0.02	0.03	0.03	0.19	0.15	0.16	0.07	0.04	0.01	0	0	0.02	0.02	0	0	0.04	0	0	0	0.02	0.01	0	0	0	0	0.02	0	0.02
Bi	0.01	0	0.03	0.01	0	0.03	0.04	0.01	0.04	0.01	0	0	0.16	0.03	0.01	0.02	0	0.01	0.02	0	0.05	0.04	0.04	0	0	0.03	0.02	0	0.04	0.05	0.05	0.01	0.03	0.03	0.02	0.01	0.03	0.02	0.01	0.1	0.01	0.01	0	0	0	0	0	0	0.02
Pb	0.41	1.97	0.05	0.18	0.1	0.42	0.79	0.45	1.32	3.02	0.7	0.41	2.71	8	4.56	1	0.4	2.93	3.76	5.03	6.04	2.47	2.22	2.49	6.89	11.11	4.76	3.63	14.09	2.12	3.53	2.88	5.82	12.64	3.34	4.08	8.88	3.9	8.03	13.48	0.24	0.11	0.41	0.12	0.12	0.1	0.27	0.15	0.25
Th	0.22	0.61	0.11	0.19	0.18	0.37	0.62	0.45	0.21	2.13	0.32	0.18	2.67	63.63	6.89	0.34	0.11	0.17	7.2	7.21	3.24	11.14	0.75	4.86	23.16	31.66	27.84	10.18	11.81	5.77	29.86	15.95	4.9	44.02	17.67	17.83	15.56	3.31	28.92	22.09
U	0.05	0.22	0.02	0.05	0.01	0.03	0.08	0.08	0.05	1.72	0.07	0.02	0.63	2.2	4.49	0.07	0.02	0.06	0.97	0.3	0.97	0.13	0.65	0.19	2.59	1.42	5.49	0.29	1.74	1.62	2.78	1.32	1.37	3.28	4.84	1.41	3.87	3.42	3.06	0.36
[truncated: 8 more columns]

## Sheet: Table S3
Table S3 Sr isotopic compositions of the clinopyroxene in the Wajilitag nepheline syenite and nephelinite, Tarim LIP, NW China.
Sample	87Sr/86Sr	2SE	84Sr/86Sr	2SE	88Sr	85Rb	Rb/Sr
Nephelinite
20-NS-2-Q2	0.704072	0.000292	0.0569	0.0004	0.61	0.0003	0.00044
20-NS-7-Q1	0.704233	0.0002	0.0565	0.0002	1.18	0.0562	0.05899
20-NS-7-Q2	0.703479	0.000221	0.0569	0.0002	0.99	0.0008	0.00088
BT-11-2-Q1	0.703615	6.7e-05	0.0567	0.0001	4.28	0.0062	0.00213
BT-11-2-Q2	0.70359	0.000125	0.0569	0.0001	1.97	0.0023	0.00137
BT-11-2-Q3	0.703571	0.000121	0.0568	0.0001	1.7	0.0094	0.00646
BT-11-2-Q4	0.703651	8.7e-05	0.0567	0.0001	2.75	0.018	0.00732
BT-11-2-Q5	0.703491	5.1e-05	0.0566	0	5.36	0.0014	0.00028
BT-5-Q3	0.703581	8.8e-05	0.0565	0.0001	2.94	0.0013	0.00046
BT-5-Q4	0.70358	4.2e-05	0.0565	0.0001	4.88	0.0049	0.00114
BT-5-Q5	0.703621	0.000134	0.0563	0.0001	1.81	0.0008	0.00047
BT-9-Q1	0.703681	0.00011	0.0565	0.0001	2.39	0.0198	0.01158
BT-9-Q2	0.703464	8.6e-05	0.0565	0.0001	2.29	0.0001	1e-05
BT-9-Q3	0.703635	7.2e-05	0.0564	0.0001	3.37	0.0212	0.00677
BT-9-Q4	0.703523	9.7e-05	0.0564	0.0001	2.33	0.0045	0.00205
BT-9-Q5	0.703435	9e-05	0.0564	0.0001	2.25	0.0049	0.00258
Nepheline syenite
WZ-11-2-Q1	0.704407	0.000209	0.0571	0.0002	1.05	0.0467	0.05074
WZ-11-2-Q1	0.70371	0.000201	0.0563	0.0003	0.73	0.0018	0.0029
WZ-11-2-Q2	0.70353	0.000354	0.0573	0.0003	0.57	0.0001	0.00015
WZ-11-2-Q2	0.703684	0.00026	0.057	0.0003	0.68	0.0012	0.00182
WZ-13-1-Q1	0.704959	0.000226	0.0476	0.0008	0.94	0.0203	0.02322
WZ-13-1-Q2	0.703844	0.000289	0.0571	0.0004	0.59	0.0083	0.01643
WZ-4-2-Q1	0.703876	0.000167	0.0565	0.0002	1.14	0.0123	0.01212
WZ-4-2-Q1	0.70493	0.000174	0.0564	0.0002	1.23	0.1199	0.11123
WZ-9-1-Q1	0.704413	0.000154	0.0486	0.0004	1.18	0.0001	4e-05

## Sheet: Table S4
Table S4 Major element analyses of the alkali feldspar in the Wajilitag nepheline syenite, TLIP, Tarim LIP, NW China.
Sample	WZ1903-8-Q1-1	WZ1903-8-Q4-10	WZ1903-9-1-Q3-2	WZ1903-8-Q3-8	WZ1903-8-Q1-5	WZ1903-13-1-Q2-3	WZ1903-11-2-Q4-4	WZ-13-01-Q3-3	WZ-13-01-Q5-4	WZ1903-4-2-Q3-1	WZ1903-9-1-Q2-5	WZ1903-9-1-Q1-3	WZ1903-9-1-Q2-1	WZ1903-9-1-Q2-2	WZ1903-8-Q3-3	WZ1903-8-Q2-5	WZ1903-9-1-Q3-1	WZ1903-8-Q4-2	WZ1903-4-2-Q1-1	WZ1903-8-Q1-6	WZ1903-9-1-Q4-2	WZ1903-8-Q4-9	WZ1903-8-Q3-5	WZ1903-8-Q3-2	WZ1903-9-1-Q2-1	WZ1903-9-1-Q2-2	WZ1903-8-Q3-3	WZ1903-8-Q2-5	WZ1903-9-1-Q3-1	WZ1903-8-Q4-2	WZ1903-4-2-Q1-1	WZ1903-8-Q1-6	WZ1903-9-1-Q4-2	WZ1903-8-Q4-9	WZ1903-8-Q3-5	WZ1903-8-Q3-2
SiO2	68.92	68.7	68.54	68.35	68.28	67.31	66.86	69.04	67.96	66.51	66.11	66.07	66	65.94	65.92	65.89	65.73	65.62	65.6	65.5	65.04	64.95	64.91	64.88	66	65.94	65.92	65.89	65.73	65.62	65.6	65.5	65.04	64.95	64.91	64.88
Al2O3	19.69	19.21	19.58	19.04	19.44	18.84	18.59	19.17	18.66	19.04	19.13	18.61	19.21	18.96	18.43	18.95	18.51	18.32	18.48	18.33	18.59	18.43	18.36	18.7	19.21	18.96	18.43	18.95	18.51	18.32	18.48	18.33	18.59	18.43	18.36	18.7
CaO	0.09	0.03	0.2	0.07	0.02	0.14	0.03	0.11	0.12	0.07		0.05	0.16	0.1	0.06	0.07		0.09	0.09	0.01	0.01			0.01	0.16	0.1	0.06	0.07		0.09	0.09	0.01	0.01			0.01
Na2O	11.45	11.07	11.4	11.22	10.37	11.17	10.44	11.16	11.44	6.39	4.87	5.34	6.64	5.79	5.56	4.24	4.4	4.56	5.28	1.96	3.98	1.57	1.29	2.01	6.64	5.79	5.56	4.24	4.4	4.56	5.28	1.96	3.98	1.57	1.29	2.01
K2O	0.19	0.13	0.21	0.16	1.15	0.16	1.4	0.14	0.2	8.1	10.02	9.43	7.06	9.18	8.46	10.87	11.3	9.99	9.24	13.87	11.23	14.12	14.87	13.53	7.06	9.18	8.46	10.87	11.3	9.99	9.24	13.87	11.23	14.12	14.87	13.53
Si	3	3.02	2.99	3.01	3.01	3.01	3.01	3.02	3.02	2.99	2.99	3	2.98	2.98	3.01	2.99	2.99	3.01	3	3.01	2.99	3	3	2.99	2.98	2.98	3.01	2.99	2.99	3.01	3	3.01	2.99	3	3	2.99
Al	1.01	0.99	1.01	0.99	1.01	0.99	0.99	0.99	0.98	1.01	1.02	1	1.02	1.01	0.99	1.01	0.99	0.99	1	0.99	1.01	1	1	1.02	1.02	1.01	0.99	1.01	0.99	0.99	1	0.99	1.01	1	1	1.02
Ca	0	0	0.01	0	0	0.01	0	0	0.01	0		0	0.01	0	0	0		0	0	0	0			0	0.01	0	0	0		0	0	0	0			0
Na	0.97	0.94	0.97	0.96	0.89	0.97	0.91	0.95	0.98	0.56	0.43	0.47	0.58	0.51	0.49	0.37	0.39	0.4	0.47	0.17	0.35	0.14	0.12	0.18	0.58	0.51	0.49	0.37	0.39	0.4	0.47	0.17	0.35	0.14	0.12	0.18
K	0.01	0.01	0.01	0.01	0.06	0.01	0.08	0.01	0.01	0.46	0.58	0.55	0.41	0.53	0.49	0.63	0.66	0.58	0.54	0.81	0.66	0.83	0.88	0.8	0.41	0.53	0.49	0.63	0.66	0.58	0.54	0.81	0.66	0.83	0.88	0.8
An	0.45	0.15	0.94	0.33	0.08	0.68	0.16	0.51	0.56	0.34		0.22	0.76	0.46	0.29	0.34		0.44	0.44	0.05	0.03			0.04	0.76	0.46	0.29	0.34		0.44	0.44	0.05	0.03			0.04
Ab	98.51	99.09	97.91	98.76	93.15	98.42	91.74	98.66	98.3	54.35	42.5	46.14	58.39	48.71	49.82	37.09	37.19	40.74	46.28	17.69	34.98	14.49	11.62	18.45	58.39	48.71	49.82	37.09	37.19	40.74	46.28	17.69	34.98	14.49	11.62	18.45
Or	1.05	0.77	1.16	0.92	6.77	0.9	8.1	0.83	1.13	45.31	57.5	53.64	40.85	50.83	49.89	62.57	62.81	58.82	53.28	82.25	64.99	85.51	88.38	81.51	40.85	50.83	49.89	62.57	62.81	58.82	53.28	82.25	64.99	85.51	88.38	81.51

## Sheet: Table S5
Table S5 Major element analyses of the nepheline in the Wajilitag nepheline syenite, Tarim LIP, NW China.
Sample	WZ1903-11-2-Q1-1	WZ1903-4-2-Q4-1	WZ1903-13-1-Q3-3	WZ1903-13-1-Q2-5	WZ1903-8-Q3-1	WZ1903-11-2-Q3-2	WZ1903-9-1-Q4-4	WZ1903-4-2-Q2-4	WZ1903-4-2-Q2-3	WZ1903-9-1-Q4-1	WZ1903-9-1-Q4-5	WZ1903-13-1-Q1-1	WZ1903-4-2-Q3-3	WZ1903-13-1-Q1-2	WZ1903-11-2-Q3-1	WZ1903-8-Q2-1	WZ1903-9-1-Q1-2	WZ1903-8-Q3-9	WZ1903-8-Q1-4	WZ1903-8-Q4-5	WZ1903-8-Q4-6	WZ1903-13-1-Q1-4
	Nepheline																	Cancrinite
SiO2	45.49	45.12	45.09	45.07	45.07	45.04	44.95	44.91	44.89	44.86	44.8	44.72	44.66	44.62	44.29	43.8	42.86	43.86	43.54	43.5	42.83	41.98
TiO2	0.01	0.04	0	0	0	0	0.02	0.04	0.02	0	0.02	0.01	0	0	0	0.05	0.02	0.03	0	0	0.01	0
Al2O3	30.41	32.32	32.2	31.88	31.94	31.82	32.21	31.43	31.92	31.24	31.49	31.83	32.37	31.5	31.59	32.11	32.4	32.63	32.37	32.93	32.95	32.7
FeO	0.81	0.6	0.46	0.65	0.83	0.56	0.57	0.66	0.75	0.6	0.57	0.57	0.56	0.57	0.44	0.57	0.29	0.51	0.38	0.26	0.33	0.15
MnO	0	0	0	0	0.03	0	0	0	0	0.02	0	0.02	0.02	0	0.01	0.01	0	0.04	0.01	0.03	0.05	0.04
MgO	0.04	0.06	0	0	0	0	0	0.02	0	0	0	0	0	0.01	0	0	0	0.03	0	0	0	0
CaO	0.44	0.11	0.43	0.16	0.04	0.39	0.1	0.04	0.04	0.11	0.06	0.23	0.02	0.29	0.37	0.05	0.03	1.55	4.1	4.4	4.59	6.14
Na2O	15.1	15.77	16.55	15.72	15.82	15.75	15.8	15.83	16.07	15.35	15.66	15.56	16.44	15.5	15.53	15.48	15.67	18.33	16.81	17.26	17.87	16.94
K2O	5.11	5.74	5.62	5.52	5.17	5.49	5.79	5.22	5.67	5.63	5.9	5.57	5.36	5.57	5.8	5.68	6.72	0.64	0.06	0.02	0.03	0.13
P2O5	0.05	0	0.03	0	0	0.04	0.02	0	0	0	0.1	0.07	0	0	0.01	0.05	0	0.01	0.01	0.01	0	0
Cr2O3	0.15	0	0.02	0	0	0.01	0	0.01	0	0	0	0	0.04	0	0	0	0.02	0.04	0	0	0	0.01
NiO	0.02	0	0	0	0	0.02	0	0.01	0.04	0	0	0.01	0.04	0.04	0.02	0.02	0	0.04	0	0	0	0.02
F	0	0	0	0	0	0	0	0	0.01	0	0	0	0	0	0	0	0	0	0	0	0	0
Cl	0.08	0.05	0	0.03	0.02	0.05	0.01	0.08	0.06	0.01	0.04	0.01	0.01	0	0.1	0.01	0	0.6	0.01	0	0.02	0.01
Total	97.7	99.81	100.4	99.02	98.91	99.17	99.48	98.22	99.48	97.82	98.63	98.6	99.5	98.08	98.16	97.83	98.02	98.29	97.29	98.41	98.68	98.13

## Sheet: Table S6
Table S6 Major element analyses of the sodalite in the Wajilitag nepheline syenite, Tarim LIP, NW China.
Sample	WZ1903-4-2-Q4-2	WZ1903-8-Q3-7	WZ1903-8-Q2-4	WZ1903-9-1-Q1-5	WZ1903-11-2-Q4-5	WZ1903-9-1-Q2-4	WZ1903-8-Q4-8	WZ1903-11-2-Q1-3	WZ-11-2-Q4-20
SiO2	41.33	40.59	40.19	39.82	39.68	39.51	39.4	38.74	37.56
TiO2	0	0	0.02	0	0.01	0.01	0	0.01	0
Al2O3	32.72	33.41	34.11	32.89	32.32	33.09	32.79	31.23	31.78
FeO	0.48	0.35	0.46	0.45	0.34	0.36	0.14	0.32	0.4
MnO	0.04	0	0.03	0.01	0.03	0	0.01	0.01	0
MgO	0	0.02	0.01	0.01	0	0.03	0.02	0.03	0
CaO	0.18	0.17	0.11	0.2	0.26	0.21	0.05	0.22	0.27
Na2O	22.86	20.44	20.29	22.61	23.14	22.68	21.47	23.82	24.46
K2O	0.08	0.08	0.07	0.02	0.04	0.06	0.06	0.09	0.04
P2O5	0	0.01	0.09	0	0	0	0.04	0.05	0
Cr2O3	0	0.02	0.01	0.04	0	0	0.03	0.01	0.03
NiO	0	0	0.02	0	0.01	0.05	0	0	0
F	0	0	0	0	0	0	0	0	0.03
Cl	6.01	7.21	7.04	7.11	6.86	7.1	7.08	7.05	6.74
Total	101.13	100.67	100.84	101.55	101.15	101.49	99.49	99.97	100.14

## Sheet: Table S7
Table S7 Major element analyses of the titanite in the Wajilitag nepheline syenite, Tarim LIP, NW China.
Sample	WZ-04-01-Q1-1	WZ-04-01-Q3-1	WZ-04-01-Q5-11	WZ-9-1-Q6-1	WZ-09-02-Q1-1	WZ-09-02-Q2-1	WZ-09-02-Q3-1	WZ-09-02-Q4-1	WZ-09-02-Q4-2	WZ-09-02-Q5-1	WZ-13-01-Q2-1	WZ-13-01-Q3-2
SiO2	31.41	29.69	29	29.98	30.49	29.68	30.29	29.46	29.6	29.17	30.4	30.29
TiO2	37.94	39.46	39.96	37.07	40.45	39.01	39.46	38.81	38.46	39.48	39.85	40.11
Al2O3	1.31	1.05	1.28	1.11	1.3	1.12	0.62	0.97	0.89	1.32	1.11	1.26
FeO	1.95	1.82	1.47	1.48	1.48	1.44	2.13	1.74	1.85	1.41	1.5	1.84
MnO	0.03	0.03	0.02	0.1	0.12	0.12	0.04	0.08	0.09	0.05	0.07	0.11
MgO	0	0	0	0.04	0.06	0.02	0.01	0	0.05	0.03	0	0.01
CaO	26.2	27.56	29.07	27.99	27.73	27.17	26.75	26.76	26.98	27.53	27.3	27.38
Na2O	0.07	0.08	0.18	0.18	0.23	0.36	0.45	0.25	0.22	0.06	0.08	0.09
K2O	0.02	0.01	0.01	0	0.03	0.06	0.07	0.01	0.02	0.03	0.05	0.01
P2O5	0.06	0.07	1.68	0.07	0.09	0.1	0.03	0.04	0.03	0.11	0.11	0.11
Cr2O3	0	0.03	0	0	0	0.02	0	0.03	0.05	0.03	0.03	0
NiO	0	0.01	0.02	0.07	0	0	0	0.02	0.03	0.03	0.03	0.01
F	0.27	0.38	0.66	0.41	0.26	0.27	0.59	0.29	0.4	0.18	0.27	0.12
Cl	0	0	0.01	0.01	0.03	0.07	0.03	0.03	0.02	0	0	0.01
SO3	0	0	0	0	0	0	0	0	0	0	0	0
Total	99.15	100.03	103.08	98.34	102.15	99.3	100.2	98.36	98.51	99.37	100.68	101.29

## Sheet: Table S8
Table S8 Major element analyses of the apatite in the Wajilitag nepheline syenite, Tarim LIP, NW China.
Sample	WZ-9-1-Q4-2	WZ-13-01-Q1-1-	WZ-9-1-Q4-1
SiO2	2.09	1.31	0.29
TiO2	0	0	0.01
Al2O3	0.01	0.02	0.03
FeO	0.03	0.03	0.04
MnO	0	0.03	0
MgO	0	0	0
CaO	51.7	51.94	56.81
Na2O	0.25	0.54	0.01
K2O	0.01	0.03	0.03
P2O5	38.78	38.24	43.44
Cr2O3	0	0.01	0
NiO	0	0	0
F	4.64	4.56	4.56
Cl	0.02	0.01	0.01
SO3	0.01	0	0.07
Total	95.58	94.8	103.37

## Sheet: Table S9
Table S9 Major (wt%) and trace (ppm) elements of the Wajilitag nepheline syenite, Tarim LIP, NW China.
Sample	WZ-1	WZ-2(1)	WZ-3	WZ-4(1)	WZ-5	WZ-6(1)	WZ-8	WZ-9(1)	WZ-10	WZ-11(1)	WZ-12(1)	WZ-13(1)	WZ-15(1)
Coordinate	N39°33'28.74'' E78°56'5.58''						N39°33'18.34'' E78°55'52.94''
SiO2	52.58	52.24	52.92	52.96	52.42	52.53	52.26	51.07	50.84	50.25	52.6	51.55	49.72
TiO2	0.67	0.7	0.65	0.65	0.71	0.83	0.68	1.06	0.79	0.96	1.22	1.07	1.45
Al2O3	20.24	20.4	21.14	20.45	19.92	19.79	20.46	19.27	19.69	18.69	18.26	18.93	18.07
Fe2O3	2.78	2.95	2.82	2.85	3.23	2.59	2.84	3.28	2.92	3.43	3.6	3.54	4.12
FeO	1.33	1.26	1.26	1.11	1.08	1.94	1.04	1.83	1.26	1.4	2.26	1.69	2.51
MnO	0.15	0.15	0.14	0.15	0.15	0.16	0.15	0.19	0.19	0.21	0.19	0.21	0.22
MgO	0.7	0.7	0.79	0.66	0.87	1.04	0.73	1.31	0.88	1.15	1.5	1.01	1.64
CaO	2.33	2.5	2.27	2.28	2.53	2.64	2.53	3.78	3.31	4.06	4.09	3.67	5
Na2O	10.29	10.19	9.04	10.49	10.35	9.69	10.87	9.62	10.55	10.74	8.67	9.58	10.44
K2O	5.08	4.75	4.81	4.95	4.83	4.76	4.69	4.32	4.37	3.97	4.08	3.98	2.31
P2O5	0.11	0.12	0.11	0.13	0.14	0.16	0.12	0.22	0.19	0.21	0.24	0.23	0.33
CO2	1.15	1.36	1.32	1.02	1.19	1.19	1.69	1.27	1.69	2.29	0.68	1.53	1.53
H2O+	1.2	1.3	2.14	1.2	1.38	1.32	1.34	1.26	1.7	1.24	1.06	1.28	1.14
LOI	2.14	2.31	2.72	2.14	2.25	2.15	2.37	2.07	2.54	3.39	1.59	2.81	2.66
Total	98.4	98.27	98.67	98.82	98.48	98.28	98.74	98.02	97.53	98.46	98.3	98.27	98.47
Li	19.1	18.1	68.7	23.7	19.9	23.3	17.3	26.4	22.1	17.6	25.3	32.4	37.6
Be	6.37	6.91	5.64	6.45	5.9	6.68	6.69	5.64	6.8	12.2	6.53	8.17	8.37
Mn	1132	1106	1086	1147	1142	1152	1138	1417	1427	1626	1481	1590	1751
Co	4.92	5.09	4.75	5.04	4.98	6.45	5.19	7.69	5.61	7.07	9.86	7.22	11.2
Ni	4.81	3.28	4.3	3.61	3.44	5.73	3.98	8.18	5.73	7.53	16.3	5.62	13.8
Cu	13.6	10.1	9.85	13.1	8.43	15.1	11.8	16.2	13.4	16.5	18.1	14.6	23.4
Zn	123	97.4	98.5	98.1	105	115	97.5	121	125	145	129	152	142
Ga	39.7	39.5	39.9	39	39.8	38.8	39.1	35.1	37.3	34.6	36	38.2	38.2
Rb	181	172	160	176	167	157	137	119	117	90.8	124	124	57.9
Sr	1819	1820	1802	2024	1627	1636	1991	2853	2924	2571	2812	3738	2636
Mo	4.79	8.1	5.82	11.5	6.84	4	12.9	15.4	24.8	8.64	8.45	18.6	19.5
Cd	0.23	0.26	0.25	0.14	0.16	0.23	0.26	0.3	0.41	0.81	0.22	0.25	0.29
In	0.09	0.07	0.06	0.07	0.07	0.06	0.07	0.1	0.08	0.09	0.1	0.11	0.12
Cs	1.62	1.03	1.05	1.35	1.27	1.58	1.11	1.28	1.19	1.09	2.47	2.06	0.78
Ba	1632	1605	1475	1655	1373	1609	1547	2840	2722	3087	2713	3409	2708
Tl	0.32	0.27	0.19	0.27	0.28	0.25	0.25	0.23	0.23	0.17	0.21	0.21	0.1
Pb	8.07	11.9	14.6	11.8	10.8	11.8	23.1	13.5	22.4	31.9	14.3	25.2	22.1
Bi	<0.05	0.1	0.09	0.09	0.05	0.1	0.16	0.11	0.19	0.81	0.09	0.15	0.18
Th	7.52	16.3	11.7	17.4	14.9	14.7	26.4	18.3	49.1	26.8	20.5	45	35.6
U	3.17	3.92	3.52	3.96	4.46	6.09	4.33	3.22	4.05	6.05	3.45	7.42	8.37
Nb	156	143	130	141	134	147	142	194	182	225	190	235	261
Ta	4.25	4.7	3.98	4.16	4.2	4.59	4.19	7.66	6.51	7.19	8.99	9.77	9.21
Zr	945	832	739	815	880	946	734	796	799	981	805	1084	1246
Hf	18.7	18.1	15.7	16.3	18.7	18.9	15.1	18.8	17.9	20.8	19.5	23.5	25.6
Ti	3797	4027	3717	3932	4002	4582	4020	6241	4607	5462	7141	6359	8597
W	3.37	3.75	3.14	5.06	2.48	1.84	6.15	8.4	9.34	4.12	3.34	8.53	4.36
As	5.32	3.8	3.83	3.75	4.25	2.19	4.19	6.9	8.66	6.2	3.36	8.85	4.55
V	38.3	39.4	37.4	40.8	40.6	44.6	41.4	60.9	43	54.3	67.7	52.2	89.4
La	86.5	104	108	114	107	108	190	173	390	177	150	258	198
Ce	153	183	177	185	180	185	272	296	597	330	285	406	362
Pr	15.6	18.1	16.7	17.1	17.1	18.2	24.8	30.3	59.7	34	29.5	42.8	36.7
Nd	50.7	59.8	54.5	54	54.8	57.1	87.2	115	201	135	117	152	145
Sm	7.7	9.06	7.98	8.31	8.52	9.53	10.9	15.7	24.4	18.4	16.6	20.4	20.1
Eu	2.25	2.57	2.25	2.46	2.42	2.68	3.1	4.49	6.71	5.19	4.86	5.81	5.72
Gd	6.24	7.01	6.24	6.57	6.9	7.81	8.67	12.4	17.7	14.2	12.4	15.5	16.2
Tb	0.85	0.98	0.87	0.94	0.92	1.04	1.18	1.68	2.29	1.83	1.69	2.12	2.07
Dy	4.75	5.43	4.73	5.02	4.92	5.66	6.45	8.88	12.5	9.73	9.11	11.6	11.1
Ho	0.9	1.03	0.9	0.98	0.98	1.07	1.24	1.72	2.32	1.79	1.62	2.2	2.08
Er	2.58	2.75	2.37	2.75	2.65	2.93	3.44	4.36	6.05	4.59	4.09	5.8	5.31
Tm	0.39	0.41	0.35	0.4	0.38	0.42	0.48	0.6	0.83	0.67	0.55	0.78	0.72
Yb	2.75	2.77	2.38	2.69	2.71	2.83	3.03	3.7	5.11	4.65	3.3	4.68	4.55
Lu	0.45	0.46	0.38	0.43	0.43	0.45	0.45	0.54	0.71	0.73	0.5	0.65	0.67
Sc	5.22	4.53	3.65	5.49	6.69	7.01	5.42	7.36	5.39	5.79	5.91	6.46	8.15
Y	22.2	24.7	21.9	25.6	23.6	25.4	33.9	41.8	55.8	41.4	37.4	55.3	50.9

## Sheet: Table S10
Table S10 Zircon U–Pb ages of the Wajilitag nepheline syenite, Tarim LIP, NW China.
Analysis spot	Elemental data (ppm)			Th/U	Isotopic ratios						Apparent age (Ma)
	Pb	Th	U		207Pb/206Pb	±1σ(%)	207Pb/235U	±1σ(%)	206Pb/238U	±1σ(%)	207Pb/206Pb	±1σ	207Pb/235U	±1σ	206Pb/238U	±1σ
DW17-01	294.134	1710.4	1841.43	0.928841	0.0538	0.00077	0.35454	0.00515	0.04768	0.00033	363	20	308	4	300	2
DW17-02	383.495	2479.56	1616.9	1.53353	0.0537	0.00091	0.35528	0.00684	0.04775	0.00043	359	27	309	5	301	3
DW17-03	43.6092	241.532	384.343	0.628428	0.05433	0.00142	0.3382	0.00929	0.04497	0.00043	385	44	296	7	284	3
DW17-04	576.348	3560.83	2433.34	1.46335	0.05531	0.00073	0.36477	0.00463	0.04776	0.00022	425	20	316	3	301	1
DW17-05	11.6367	26.524	87.6219	0.30271	0.05245	0.00424	0.3074	0.02468	0.04251	0.00044	305	186	272	19	268	3
DW17-06	735.448	4918.95	2332.04	2.10929	0.05426	0.0007	0.35691	0.00467	0.04766	0.00029	382	19	310	3	300	2
DW17-07	680.593	4387.67	2432.97	1.80342	0.05303	0.00071	0.34902	0.00508	0.04764	0.00031	330	21	304	4	300	2
DW17-08	8.02893	32.0907	104.099	0.308272	0.05589	0.00261	0.32979	0.0149	0.04318	0.00058	448	77	289	11	272	4
DW17-09	12.2769	55.9382	174.861	0.319901	0.04966	0.00188	0.29426	0.01093	0.04323	0.00044	179	68	262	9	273	3
DW17-10	1093.17	7398.1	3479.21	2.12637	0.05209	0.00066	0.34408	0.00449	0.04782	0.00028	289	19	300	3	301	2
DW17-11	56.9607	299.398	470.818	0.635911	0.05611	0.00139	0.35098	0.00877	0.04534	0.00041	457	39	305	7	286	3
DW17-12	12.255	54.8211	147.408	0.3719	0.04906	0.00141	0.29299	0.00832	0.04341	0.00044	151	47	261	7	274	3
DW17-13	349.894	2113.36	1464.59	1.44298	0.05517	0.00089	0.36933	0.00554	0.04852	0.00025	419	24	319	4	305	2
DW17-14	8.81588	39.8984	122.442	0.325857	0.05211	0.00231	0.30955	0.01325	0.04338	0.00053	290	75	274	10	274	3
DW17-15	124.332	791.787	730.674	1.08364	0.05345	0.00127	0.32955	0.00747	0.04473	0.0003	348	39	289	6	282	2
DW17-16	27.8934	117.856	360.342	0.327068	0.05525	0.00141	0.32655	0.00836	0.04279	0.0003	422	45	287	6	270	2
DW17-17	20.142	33.55	104.78	0.320195	0.05229	0.0028	0.3146	0.01632	0.04364	0.00061	298	93	278	13	275	4
DW17-18	18.337	27.69	100.81	0.274675	0.05167	0.00169	0.30696	0.00963	0.04309	0.00039	271	55	272	7	272	2
DW17-19	35.489	89.57	189.05	0.47379	0.05337	0.00245	0.31261	0.01387	0.04249	0.00052	345	78	276	11	268	3
DW17-20	35.786	99.44	182.65	0.544429	0.0515	0.00144	0.30904	0.00817	0.04353	0.00038	263	45	273	6	275	2
DW17-21	42.451	105.03	224.84	0.467132	0.05241	0.00229	0.30929	0.01305	0.04281	0.00051	303	74	274	10	270	3
DW17-22	103.27	391.01	499.71	0.782474	0.05242	0.00073	0.32665	0.00377	0.0452	0.0003	304	15	287	3	285	2
DW17-23	23.76	42.57	113.3	0.375728	0.05362	0.00332	0.32119	0.01931	0.04345	0.00068	355	108	283	15	274	4
DW17-24	20.818	39.41	109.98	0.358338	0.05223	0.00166	0.31268	0.00949	0.04343	0.00038	295	53	276	7	274	2
DW17-25	39.94	104.42	203.54	0.51302	0.04994	0.00117	0.29873	0.00649	0.04339	0.00033	192	36	265	5	274	2
DW17-26	73.44	252.39	340.8	0.740581	0.05227	0.00147	0.32545	0.00865	0.04517	0.00039	297	45	286	7	285	2

[truncated: 2 more sheets: Table S11, Table S12]
